# Supplementary material for: Enhanced chemiluminescence determination of paracetamol
Source: Royal Society of Chemistry journal article supplement (doi:10.1039/d0an01557a), 2020-12-10
Supplement: d0an01557a5.pdf [file d0an01557a5.pdf]

## Supplementary information for

### Enhanced Chemiluminescence Determination of Paracetamol

Simin Emdadi,<sup>\*a</sup> Mohammad Hossein Sorouraddin <sup>b</sup> and Lynn Denanny <sup>c</sup>

- Department of Analytical Chemistry, Faculty of Chemistry, University of Tabriz, Tabriz, Iran. E-mail: [siminemdadi@gmail.com](mailto:siminemdadi@gmail.com)
- Department of Analytical Chemistry, Faculty of Chemistry, University of Tabriz, Tabriz, Iran. E-mail: [soruraddin@tabrizu.ac.ir](mailto:soruraddin@tabrizu.ac.ir)
- Department of Pure & Applied Chemistry, University of Strathclyde, UK. E-mail: [lynn.dennany@strath.ac.uk](mailto:lynn.dennany@strath.ac.uk)

This file includes:

Table S1 (The concentrate rang of each parameter in 5 levels based on CCD (n=2))

Table S2 (Design matrixes generated for CCD)

Table S3 (ANOVA).

Fig. S1 Effect of the various acids on the signal/blank ratio

Fig. S2 Response surface plot and contour plot of CL intensity

Fig. S3 univariate optimization

**Table S1** The concentrate rang of each parameter in 5 levels based on CCD (n=2)

| Factor                             | Symbol         | Level    |       |      |       |           |
|------------------------------------|----------------|----------|-------|------|-------|-----------|
|                                    |                | $\alpha$ | 1     | 0    | -1    | $-\alpha$ |
| H <sub>2</sub> SO <sub>4</sub> (M) | X <sub>1</sub> | 0.018    | 0.014 | 0.01 | 0.006 | 0.002     |
| SDS % (w/v)                        | X <sub>2</sub> | 6.6      | 5.2   | 3.8  | 2.4   | 1         |
| KMnO <sub>4</sub> (mM)             | X <sub>3</sub> | 8        | 6.5   | 5    | 3.5   | 2         |
| Rh.6G (mM)                         | X <sub>4</sub> | 2.6      | 2     | 1.4  | 0.8   | 0.2       |

**Table S2** Design matrixes generated for CCD and obtained response value (PCM 6.6  $\mu$ M).

| Run | Coded value of factors                           |                      |                        |                                     | Response | Predicted |
|-----|--------------------------------------------------|----------------------|------------------------|-------------------------------------|----------|-----------|
|     | X <sub>1</sub> (H <sub>2</sub> SO <sub>4</sub> ) | X <sub>2</sub> (SDS) | X <sub>3</sub> (Rh.6G) | X <sub>4</sub> (KMnO <sub>4</sub> ) |          |           |
| 1   | 0                                                | 0                    | 0                      | 0                                   | 83315    | 84300     |
| 2   | 0                                                | 0                    | 0                      | 0                                   | 85377    | 84300     |
| 3   | -1                                               | -1                   | -1                     | -1                                  | 39583    | 39196.2   |
| 4   | 0                                                | 0                    | 2                      | 0                                   | 36529    | 37458.6   |
| 5   | 0                                                | 2                    | 0                      | 0                                   | 29873    | 29455.3   |
| 6   | 0                                                | 0                    | 0                      | 0                                   | 82412    | 84300     |
| 7   | 1                                                | -1                   | 1                      | 1                                   | 16856    | 15671     |
| 8   | -1                                               | 1                    | 1                      | 1                                   | 38788    | 38105     |
| 9   | 0                                                | -2                   | 0                      | 0                                   | 17092    | 20356.8   |
| 10  | -2                                               | 0                    | 0                      | 0                                   | 59741    | 61177.3   |
| 11  | -1                                               | 1                    | 1                      | -1                                  | 54269    | 50023     |
| 12  | 1                                                | 1                    | 1                      | 1                                   | 14302    | 13976.2   |
| 13  | -1                                               | 1                    | -1                     | 1                                   | 55516    | 55125.5   |

|    |    |    |    |    |       |         |
|----|----|----|----|----|-------|---------|
| 14 | 0  | 0  | 0  | 0  | 85595 | 84300   |
| 15 | -1 | 1  | -1 | -1 | 47875 | 49989.5 |
| 16 | -1 | -1 | 1  | 1  | 29541 | 30780.2 |
| 17 | 0  | 0  | -2 | 0  | 59245 | 59162.5 |
| 18 | 1  | -1 | -1 | 1  | 37125 | 37408.3 |
| 19 | 0  | 0  | 0  | 0  | 84310 | 84300   |
| 20 | 1  | 1  | -1 | -1 | 54289 | 50143.2 |
| 21 | 1  | 1  | 1  | -1 | 45469 | 46961.9 |
| 22 | 1  | -1 | -1 | -1 | 47821 | 48369.5 |
| 23 | 2  | 0  | 0  | 0  | 46811 | 462218  |
| 24 | -1 | -1 | 1  | -1 | 39654 | 37727.9 |
| 25 | 1  | 1  | -1 | 1  | 32420 | 34211.7 |
| 26 | 0  | 0  | 0  | 0  | 35156 | 84300   |
| 27 | -1 | -1 | -1 | 1  | 50930 | 49302.7 |
| 28 | 0  | 0  | 0  | -2 | 43871 | 44693.1 |
| 29 | 0  | 0  | 0  | 0  | 84920 | 84300   |
| 30 | 0  | 0  | 0  | 2  | 21789 | 21814   |
| 31 | 1  | -1 | 1  | -1 | 44009 | 43686.5 |

**Table S3** Analysis of Variance for Response (ANOVA)

| Source         | DOF | Seq SS      | Adj SS      | Adj MS     | F-value | P-value |
|----------------|-----|-------------|-------------|------------|---------|---------|
| Regression     | 14  | 14480018288 | 14480018288 | 1034287021 | 508.03  | 0.000   |
| Linear         | 4   | 1951443497  | 1951443497  | 487860874  | 239.63  | 0.000   |
| H2SO4          | 1   | 335500470   | 335500470   | 335500470  | 164.79  | 0.000   |
| SDS            | 1   | 124174053   | 124174053   | 124174053  | 60.99   | 0.000   |
| KMnO4          | 1   | 706584572   | 706584572   | 706584572  | 347.07  | 0.000   |
| Rh. 6G         | 1   | 785184401   | 785184401   | 785184401  | 385.67  | 0.000   |
| Square         | 4   | 11675228112 | 11675228112 | 2918807028 | 1433.68 | 0.000   |
| H2SO4*H2SO4    | 1   | 579682710   | 1673544600  | 1673544600 | 822.03  | 0.000   |
| SDS*SDS        | 1   | 4750360362  | 6304722384  | 6304722384 | 3096.81 | 0.000   |
| KMnO4*KMnO4    | 1   | 1688116183  | 2314899007  | 2314899007 | 1137.05 | 0.000   |
| Rh. 6G*Rh. 6G  | 1   | 4657068858  | 4657068858  | 4657068858 | 2287.50 | 0.000   |
| Interaction    | 6   | 853346679   | 853346679   | 142224446  | 69.86   | 0.000   |
| H2SO4*SDS      | 1   | 81355890    | 81355890    | 81355890   | 39.96   | 0.000   |
| H2SO4*KMnO4    | 1   | 10334618    | 10334618    | 10334618   | 5.08    | 0.039   |
| H2SO4*Rh. 6G   | 1   | 443850090   | 443850090   | 443850090  | 218.01  | 0.000   |
| SDS*KMnO4      | 1   | 2255253     | 2255253     | 2255253    | 1.11    | 0.308   |
| SDS*Rh. 6G     | 1   | 24703385    | 24703385    | 24703385   | 12.13   | 0.003   |
| KMnO4*Rh. 6G   | 1   | 290847443   | 290847443   | 290847443  | 142.86  | 0.000   |
| Residual Error | 16  | 32574058    | 32574058    | 2035879    |         |         |
| Lack-of-Fit    | 10  | 27733356    | 27733356    | 2773336    | 3.44    | 0.072   |
| Pure Error     | 6   | 4840702     | 4840702     | 806784     |         |         |
| Total          | 30  | 14512592346 |             |            |         |         |

R-Sq = 99.78%  
R-Sq(adj) = 99.58%  
R-Sq(pred) = 98.85%

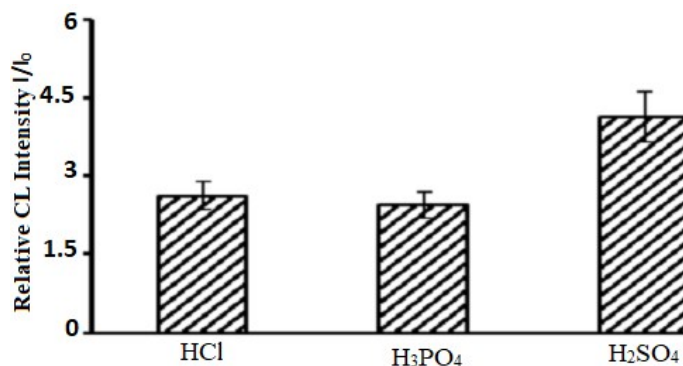

**Fig. S1** Effect of the various acids on the signal/blank ratio. Condition: KMnO<sub>4</sub>, 2.5 mM; Rh.6G, 1 mM; PCM, 6.6 μM; SDS, 5% (w/v); acid (HCl, H<sub>3</sub>PO<sub>4</sub>, and H<sub>2</sub>SO<sub>4</sub>), 0.01 M; All of the reagents dissolved in distilled water (n=5); (monitored at 560 nm).

Surface Plot of Response vs Rh.6G,  $\text{KMnO}_4$

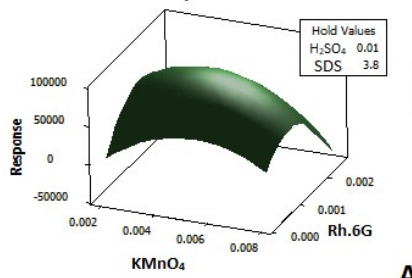

A

Contour Plot of Response vs Rh.6G,  $\text{KMnO}_4$

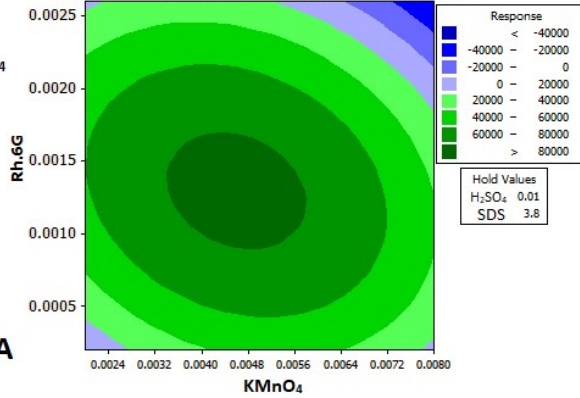

Surface Plot of Response vs Rh.6G, SDS

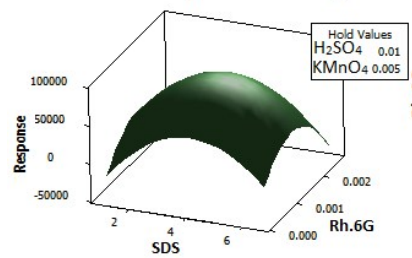

B

Contour Plot of Response vs Rh.6G, SDS

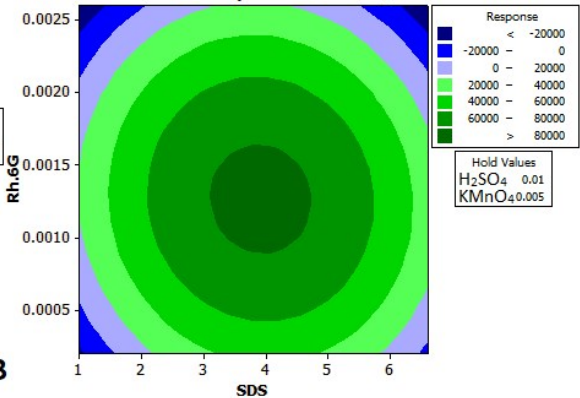

Surface Plot of Response vs SDS,  $\text{KMnO}_4$

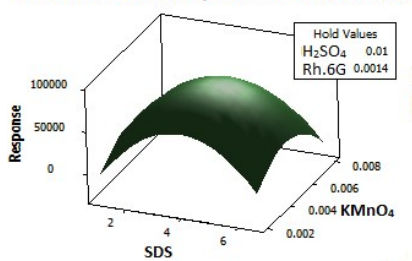

C

Contour Plot of Response vs SDS,  $\text{KMnO}_4$

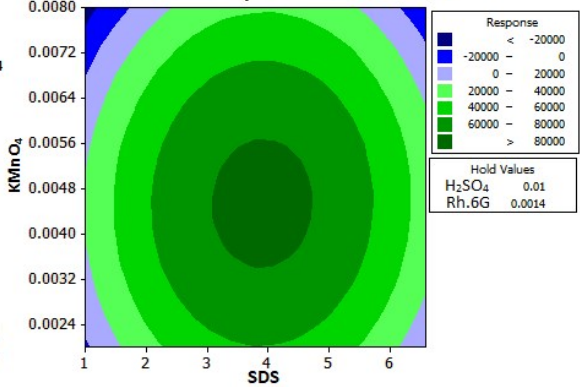

Surface Plot of Response vs Rh.6G,  $\text{H}_2\text{SO}_4$

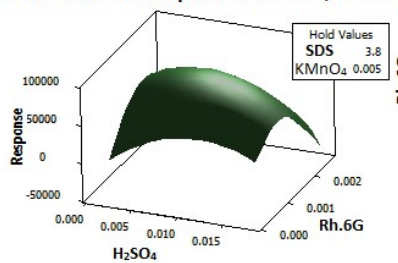

D

Contour Plot of Response vs Rh.6G,  $\text{H}_2\text{SO}_4$

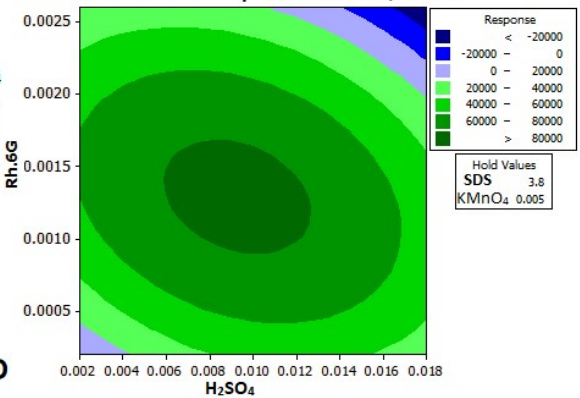

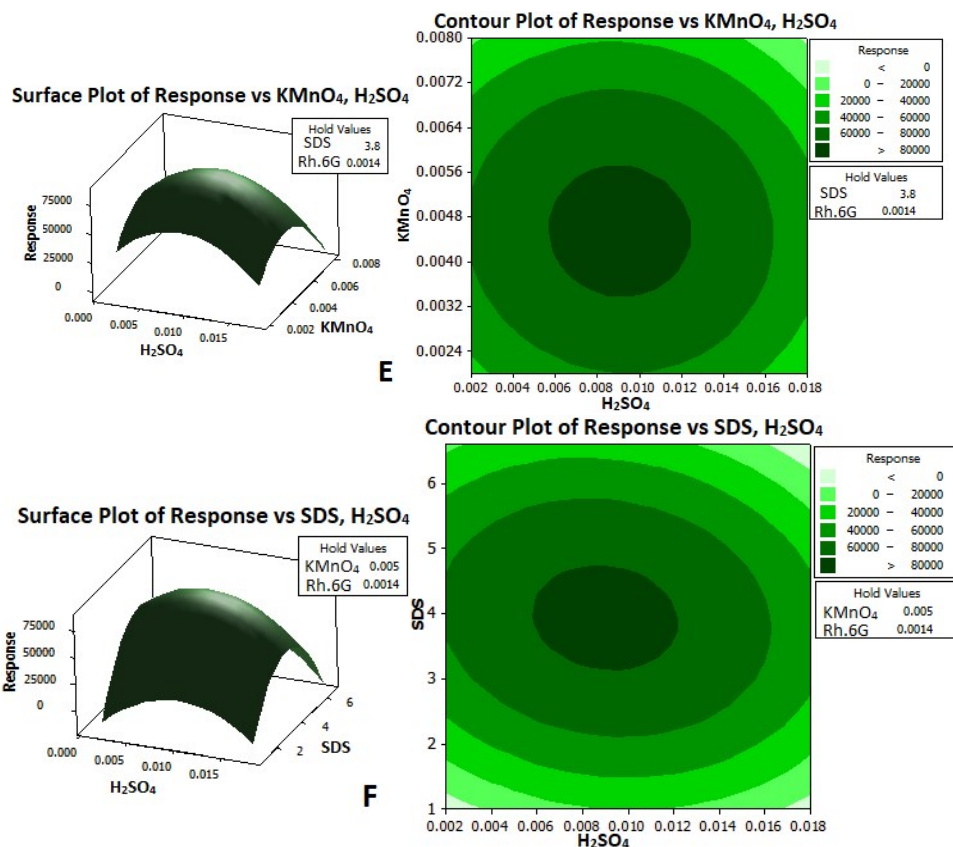

**Fig. S2** Response surface plot and contour plot of CL intensity as a function of: (A) Rh.6G and  $\text{KMnO}_4$  concentration at  $\text{H}_2\text{SO}_4$ , 0.01 M and SDS 3.8% (w/v); (B) Rh.6G concentration and SDS% at  $\text{H}_2\text{SO}_4$ , 0.01 M and  $\text{KMnO}_4$ , 5 mM; (C)  $\text{KMnO}_4$  concentration and SDS% at  $\text{H}_2\text{SO}_4$ , 0.01 M and Rh.6G, 1.4 mM; (D) Rh.6G and  $\text{H}_2\text{SO}_4$  concentration at  $\text{KMnO}_4$ , 5 mM and SDS, 3.8% (w/v); (E)  $\text{KMnO}_4$  and  $\text{H}_2\text{SO}_4$  concentration at SDS, 3.8% (w/v) and Rh.6G, 1.4 mM; (F) SDS % and  $\text{H}_2\text{SO}_4$  concentration at  $\text{KMnO}_4$ , 5 mM and Rh.6G, 1.4 mM. All of the experiments were tested at the presence of the PCM, 6.6  $\mu\text{M}$ .

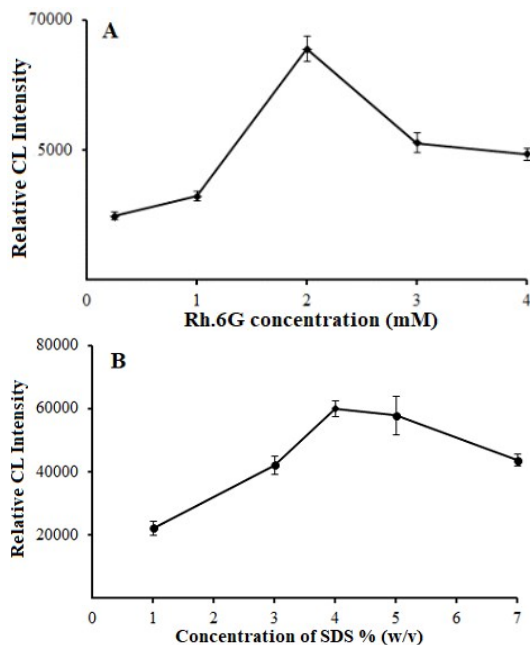

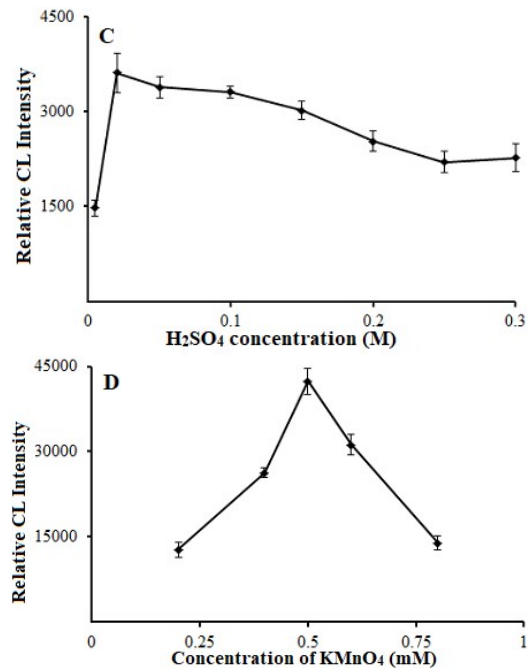

**Fig. S3** (A) The effect of concentration of Rh.6G. Condition: PCM, 6.6  $\mu$ M; SDS, 5% (w/v); H<sub>2</sub>SO<sub>4</sub> 0.05 M; KMnO<sub>4</sub>, 2.5 Mm; (B) The effect of concentration of SDS. Condition: PCM, 6.6  $\mu$ M; Rh.6G, 2 mM; H<sub>2</sub>SO<sub>4</sub>, 0.05 M; KMnO<sub>4</sub>, 2.5 mM; (C) The effect of concentration of H<sub>2</sub>SO<sub>4</sub>. Condition: PCM, 6.6 $\mu$ M; SDS, 4% (w/v); Rh.6G, 2 mM; KMnO<sub>4</sub>, 2.5 Mm; (D) The effect of concentration of KMnO<sub>4</sub>. Condition: PCM, 6.6 $\mu$ M; SDS, 4% (w/v); Rh.6G, 2 mM; H<sub>2</sub>SO<sub>4</sub>, 0.02 M. All of the reagents dissolved in distilled water. (n=5)
