# Supplementary figures and images for: Enhanced chemiluminescence determination of paracetamol
Source: Royal Society of Chemistry journal article supplement (doi:10.1039/d0an01557a), 2020-12-10

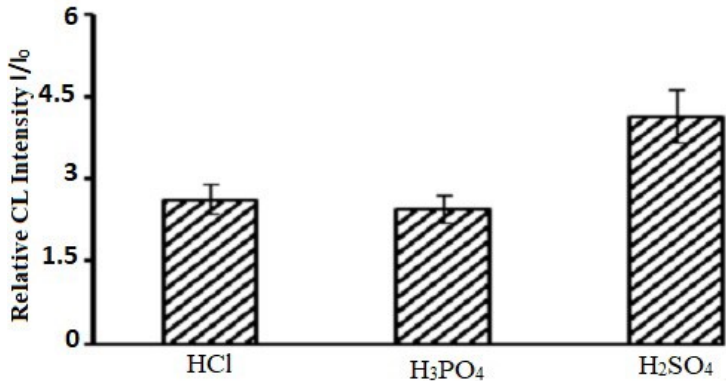

Supplement: d0an01557a2.pdf [file d0an01557a2.pdf]

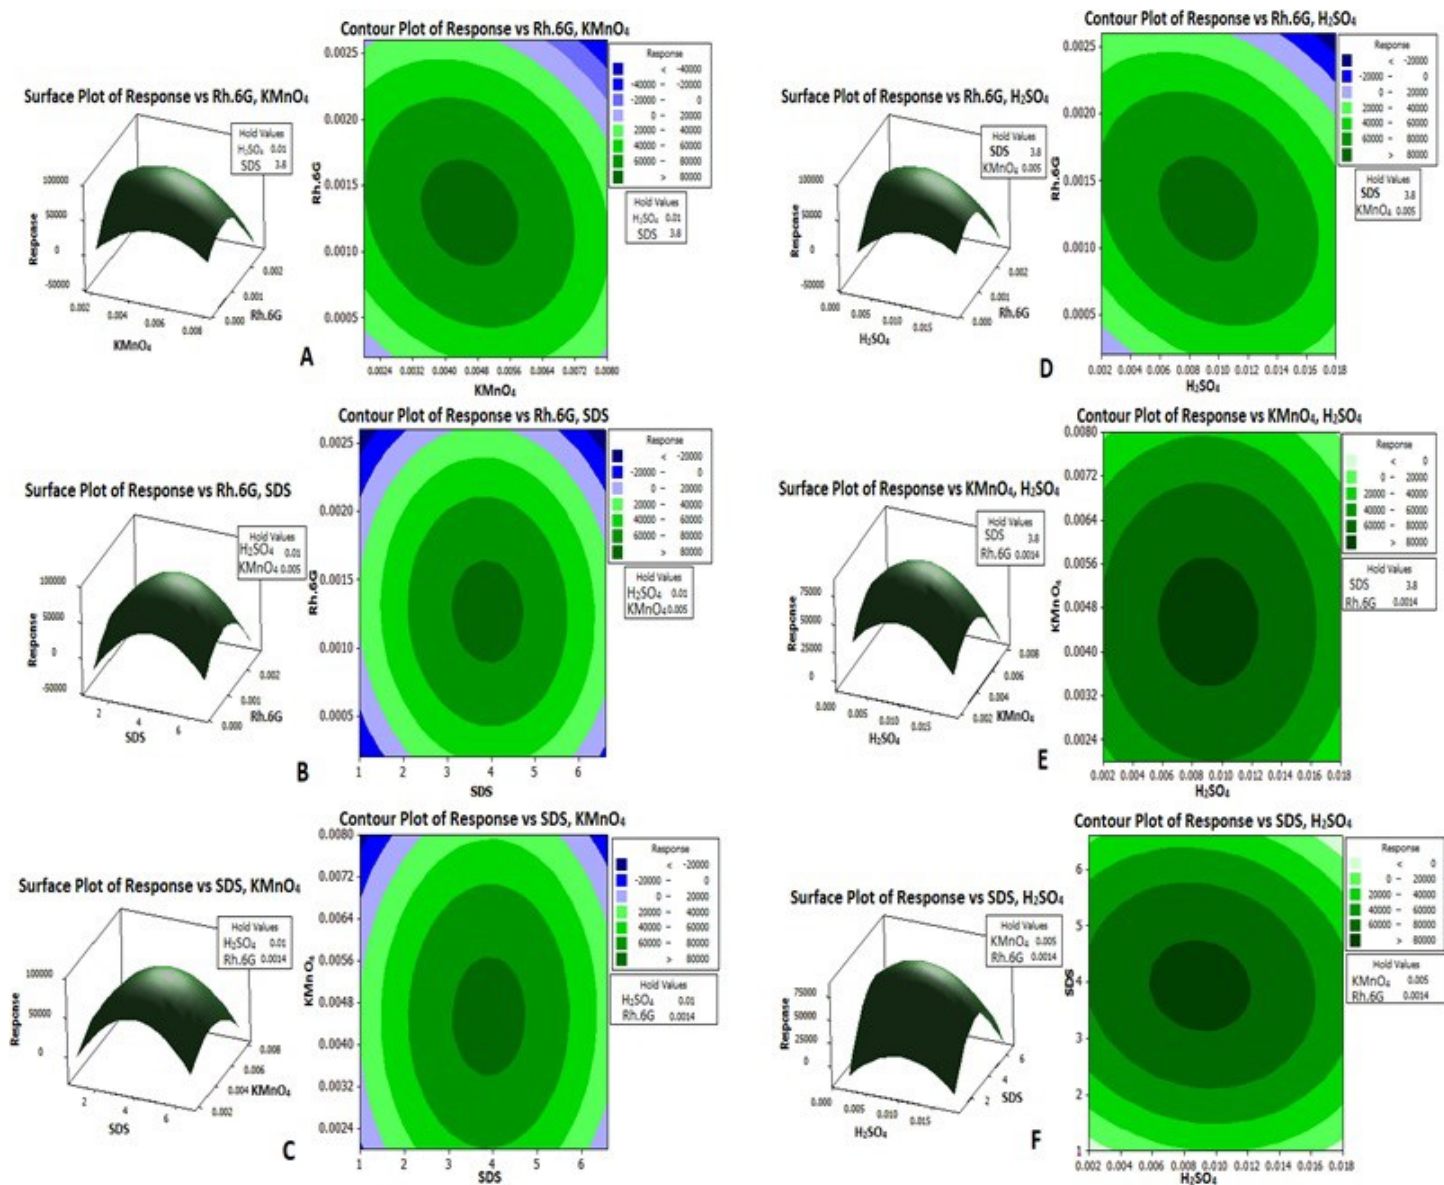

Supplement: d0an01557a3.pdf [file d0an01557a3.pdf]

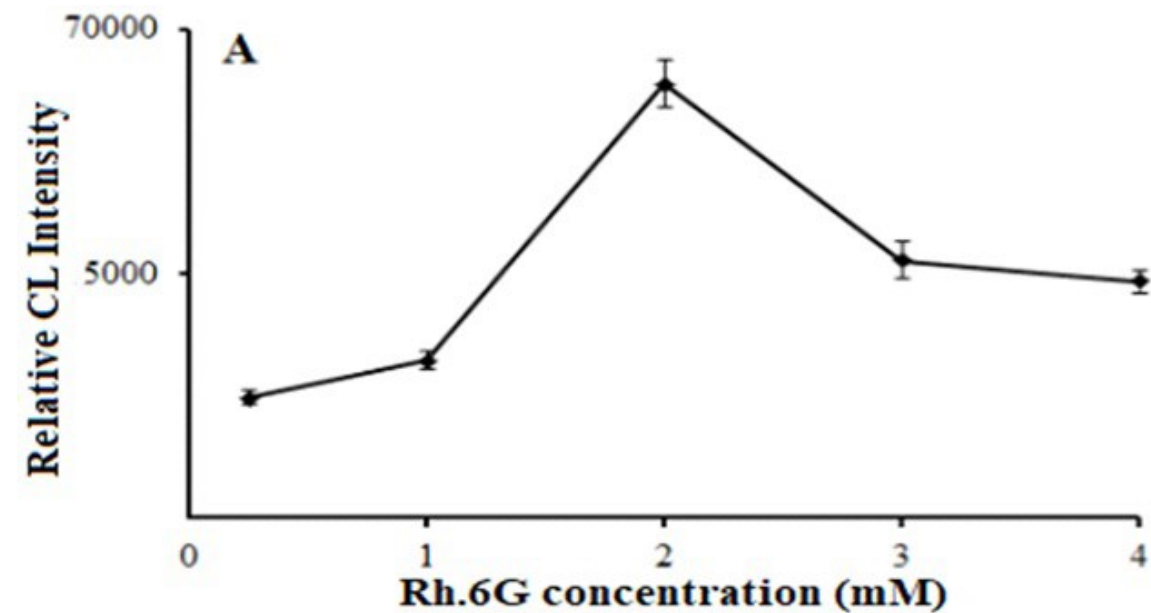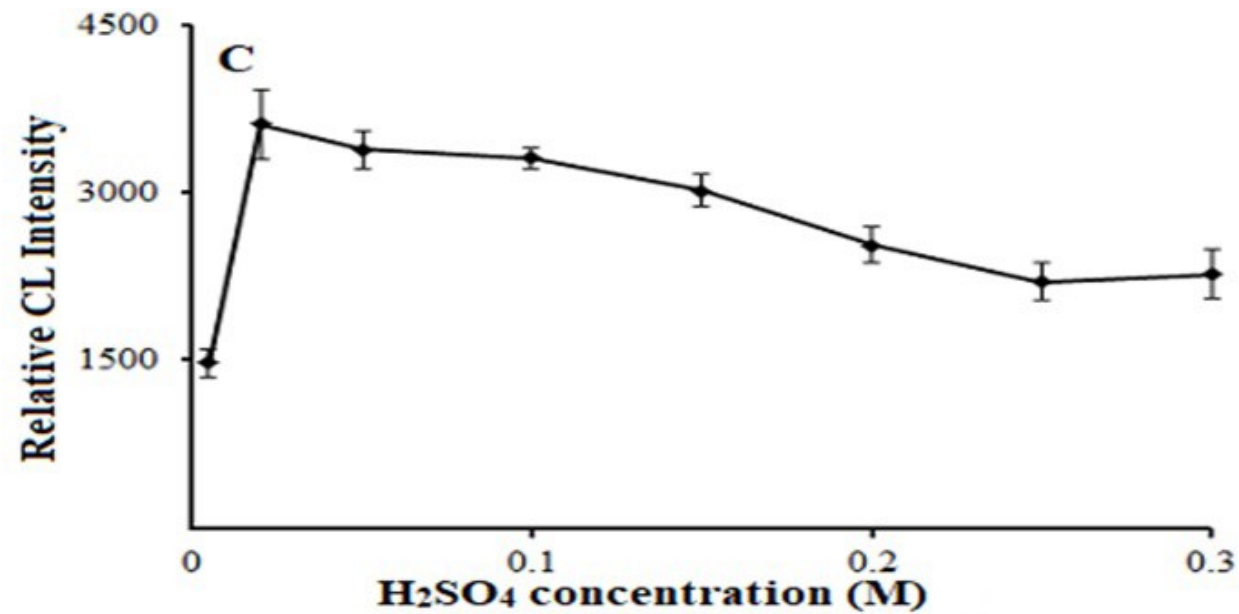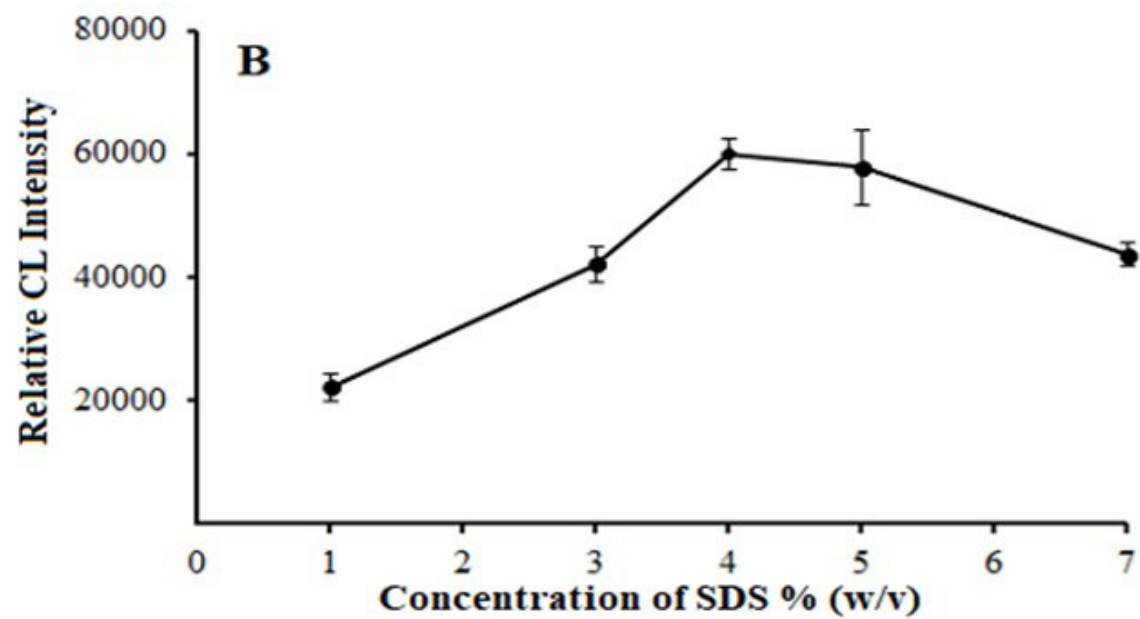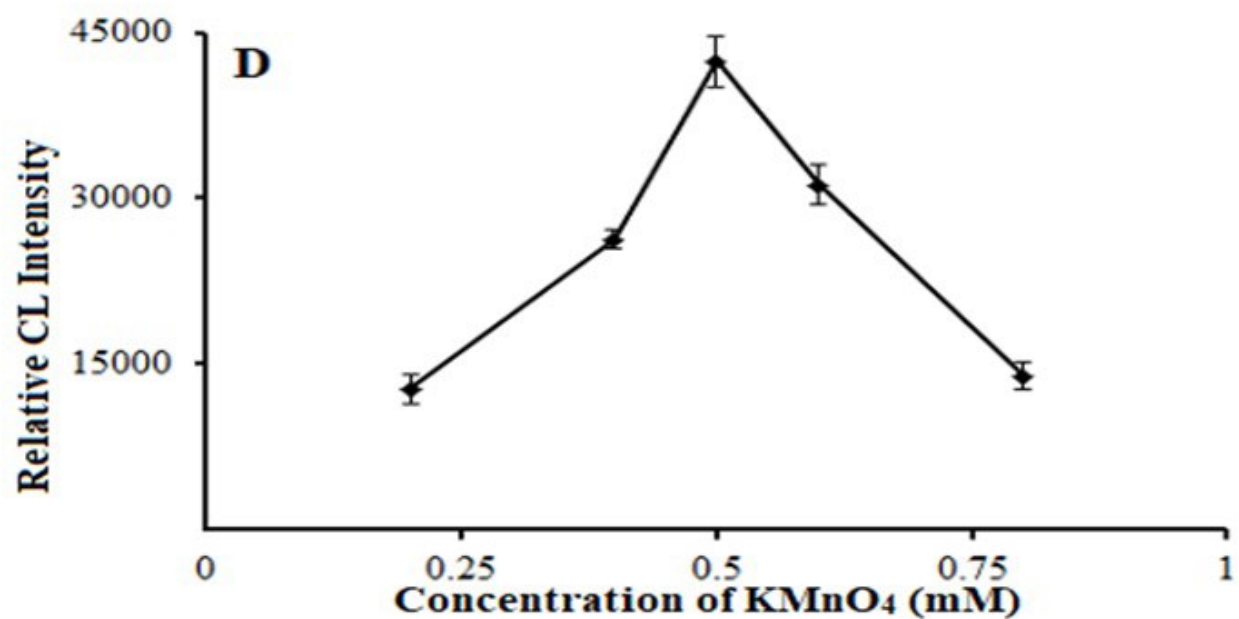

Supplement: d0an01557a4.pdf [file d0an01557a4.pdf]
